# Supplementary material
Source: publisher figshare collection journal article supplement (https://frontiersin.figshare.com/ndownloader/files/14686112)
Supplement: Supplementary file [file 14686112]

# **Harmful effect of *Rheinheimera* sp. EpRS3 (*Gammaproteobacteria*) against the protist *Euplotes aediculatus* (Ciliophora, Spirotrichea): insights into the ecological role of antimicrobial compounds from environmental bacterial strains**

Carolina Chiellini, Chiara Pasqualetti, Olivia Lanzoni, Camilla Fagorzi, Chiara Bazzocchi, Renato Fani, Giulio Petroni, and Letizia Modeo

**Table S1:** Description of the five experimental treatments applied to *Euplotes aediculatus* sub-cultures

|   | Treatment   | Amount of treatment for each ciliate sub-culture (1 ml) | Treatment description                                                                                                                       | Treatment purpose                                                                                                                                                 |
|---|-------------|---------------------------------------------------------|---------------------------------------------------------------------------------------------------------------------------------------------|-------------------------------------------------------------------------------------------------------------------------------------------------------------------|
| A | C+          | 100 µl                                                  | Sterile Tryptic Soy Broth (TSB) medium (positive control)                                                                                   | To assess any possible effect on ciliates of the bacteria growth medium                                                                                           |
| B | C-          | ---                                                     | Absence of any treatment (negative control)                                                                                                 | To assess that the experimental conditions (e.g. cell manipulation) do not affect the growth and survival of ciliates                                             |
| C | Supernatant | 100 µl                                                  | 2 ml of filtered <i>Rheinheimera</i> sp. EpRS3 liquid culture (0.2 µm), cell-free supernatant.                                              | To assess the effect on ciliates of possible bioactive molecule(s) only, dissolved in the growing medium, without living bacterial cells                          |
| D | Tq          | 100 µl                                                  | <i>Rheinheimera</i> sp. EpRS3 cells grown in Tryptic Soy Broth (TSB) medium                                                                 | To assess the effect on ciliates both of EpRS3 cells grown in the liquid medium and any possible bacterial bioactive molecule(s) produced during overnight growth |
| E | Pellet      | 100 µl                                                  | 2 ml of centrifuged <i>Rheinheimera</i> sp. EpRS3 liquid culture and pellet resuspended in saline solution (0.9% NaCl in dH <sub>2</sub> O) | To assess the effect on ciliates of bacterial cells only, without possible bioactive molecule(s) dissolved in the growing medium                                  |
